# Supplementary material for: Global patterns of raptor distribution and protected areas optimal selection to reduce the extinction crises
Source: PubMed Central journal article supplement (PMC8449406; doi:10.1073/pnas.2018203118), 2021-08-30
Supplement: pnas.2018203118.sapp.pdf [file pnas.2018203118.sapp.pdf]

Cruz et al.

Supplementary Materials

Summary of information on raptor species diversity by country.

| Continent | Country Name             | All species (n) | Diurnal Species (n) | Nocturnal Species (n) | Threatened Species (n) | Endemisms (n) | Restricted Distribution (n) |
|-----------|--------------------------|-----------------|---------------------|-----------------------|------------------------|---------------|-----------------------------|
| Africa    | Algeria                  | 40              | 32                  | 8                     | 3                      | 0             | 0                           |
|           | Angola                   | 80              | 65                  | 15                    | 7                      | 0             | 0                           |
|           | Benin                    | 66              | 54                  | 12                    | 9                      | 0             | 0                           |
|           | Botswana                 | 67              | 56                  | 11                    | 8                      | 0             | 0                           |
|           | Burkina Faso             | 60              | 50                  | 10                    | 9                      | 0             | 0                           |
|           | Burundi                  | 64              | 51                  | 13                    | 9                      | 1             | 2                           |
|           | Cameroon                 | 77              | 57                  | 20                    | 9                      | 0             | 0                           |
|           | Cape Verde               | 7               | 5                   | 2                     | 0                      | 0             | 0                           |
|           | Central African Republic | 77              | 59                  | 18                    | 9                      | 0             | 0                           |
|           | Chad                     | 63              | 51                  | 12                    | 10                     | 0             | 0                           |
|           | Comoros                  | 8               | 4                   | 4                     | 3                      | 3             | 2                           |
|           | Congo                    | 53              | 35                  | 18                    | 0                      | 0             | 0                           |
|           | Congo, DRC               | 96              | 69                  | 27                    | 9                      | 1             | 2                           |
|           | Cote d'Ivoire            | 73              | 55                  | 18                    | 9                      | 0             | 0                           |
|           | Djibouti                 | 43              | 37                  | 6                     | 9                      | 0             | 0                           |
|           | Egypt                    | 38              | 29                  | 9                     | 5                      | 0             | 0                           |
|           | Equatorial Guinea        | 34              | 23                  | 11                    | 0                      | 0             | 0                           |
|           | Eritrea                  | 70              | 57                  | 13                    | 11                     | 0             | 0                           |
|           | Ethiopia                 | 85              | 70                  | 15                    | 12                     | 0             | 0                           |
|           | Gabon                    | 45              | 29                  | 16                    | 0                      | 0             | 0                           |
|           | Gaza Strip               | 25              | 18                  | 7                     | 4                      | 0             | 0                           |
|           | Ghana                    | 72              | 55                  | 17                    | 9                      | 0             | 0                           |
|           | Guinea                   | 69              | 53                  | 16                    | 8                      | 0             | 0                           |
|           | Guinea-Bissau            | 53              | 44                  | 9                     | 8                      | 0             | 0                           |
|           | Israel                   | 37              | 26                  | 11                    | 4                      | 0             | 0                           |
|           | Kenya                    | 90              | 71                  | 19                    | 13                     | 0             | 1                           |
|           | Lesotho                  | 37              | 30                  | 7                     | 5                      | 0             | 0                           |
|           | Liberia                  | 54              | 38                  | 16                    | 4                      | 0             | 0                           |
|           | Libya                    | 21              | 15                  | 6                     | 2                      | 0             | 0                           |
|           | Madagascar               | 23              | 16                  | 7                     | 5                      | 13            | 2                           |
|           | Malawi                   | 68              | 55                  | 13                    | 7                      | 0             | 0                           |
|           | Mali                     | 64              | 51                  | 13                    | 10                     | 0             | 0                           |
|           | Mauritania               | 57              | 46                  | 11                    | 10                     | 0             | 0                           |

|             |                     |     |    |    |    |    |    |
|-------------|---------------------|-----|----|----|----|----|----|
|             | Mauritius           | 1   | 1  | 0  | 1  | 1  | 1  |
|             | Mayotte             | 6   | 3  | 3  | 0  | 1  | 1  |
|             | Morocco             | 37  | 28 | 9  | 1  | 0  | 0  |
|             | Mozambique          | 70  | 57 | 13 | 8  | 0  | 0  |
|             | Namibia             | 68  | 56 | 12 | 9  | 0  | 0  |
|             | Niger               | 64  | 52 | 12 | 10 | 0  | 0  |
|             | Nigeria             | 74  | 58 | 16 | 9  | 0  | 0  |
|             | Portugal            | 32  | 24 | 8  | 2  | 0  | 0  |
|             | Reunion             | 1   | 1  | 0  | 1  | 1  | 1  |
|             | Rwanda              | 70  | 54 | 16 | 9  | 1  | 2  |
|             | Sao Tome & Principe | 5   | 2  | 3  | 1  | 1  | 1  |
|             | Senegal             | 65  | 53 | 12 | 9  | 0  | 0  |
|             | Seychelles          | 6   | 3  | 3  | 2  | 3  | 2  |
|             | Sierra Leone        | 56  | 42 | 14 | 4  | 0  | 0  |
|             | Somalia             | 64  | 52 | 12 | 9  | 0  | 0  |
|             | South Africa        | 79  | 66 | 13 | 10 | 1  | 0  |
|             | Spain               | 38  | 28 | 10 | 2  | 0  | 0  |
|             | Sudan               | 87  | 73 | 14 | 13 | 0  | 0  |
|             | Swaziland           | 61  | 48 | 13 | 7  | 0  | 0  |
|             | Tanzania            | 83  | 67 | 16 | 13 | 1  | 2  |
|             | The Gambia          | 60  | 49 | 11 | 8  | 0  | 0  |
|             | Togo                | 62  | 53 | 9  | 8  | 0  | 0  |
|             | Tunisia             | 35  | 27 | 8  | 2  | 0  | 0  |
|             | Uganda              | 90  | 71 | 19 | 9  | 0  | 0  |
|             | Western Sahara      | 18  | 13 | 5  | 3  | 0  | 0  |
|             | Zambia              | 69  | 57 | 12 | 7  | 0  | 0  |
| Zimbabwe    | 71                  | 58  | 13 | 8  | 0  | 0  |    |
| <b>Asia</b> | Afghanistan         | 45  | 34 | 11 | 6  | 0  | 0  |
|             | Armenia             | 39  | 31 | 8  | 4  | 0  | 0  |
|             | Azerbaijan          | 39  | 31 | 8  | 4  | 0  | 0  |
|             | Bahrain             | 10  | 7  | 3  | 1  | 0  | 0  |
|             | Bangladesh          | 66  | 48 | 18 | 8  | 1  | 0  |
|             | Bhutan              | 66  | 46 | 20 | 5  | 1  | 0  |
|             | Brunei              | 33  | 24 | 9  | 2  | 2  | 1  |
|             | Bulgaria            | 44  | 33 | 11 | 4  | 0  | 0  |
|             | Cambodia            | 52  | 37 | 15 | 6  | 1  | 0  |
|             | China               | 93  | 64 | 29 | 10 | 3  | 0  |
|             | Cyprus              | 23  | 17 | 6  | 2  | 0  | 0  |
|             | Georgia             | 41  | 33 | 8  | 4  | 0  | 0  |
|             | Greece              | 44  | 34 | 10 | 4  | 0  | 0  |
|             | India               | 101 | 67 | 34 | 12 | 10 | 8  |
|             | Indonesia           | 116 | 64 | 52 | 14 | 43 | 29 |

|                  |                      |    |    |    |    |    |    |
|------------------|----------------------|----|----|----|----|----|----|
|                  | Iran                 | 51 | 40 | 11 | 6  | 0  | 0  |
|                  | Iraq                 | 36 | 28 | 8  | 4  | 0  | 0  |
|                  | Japan                | 32 | 22 | 10 | 4  | 2  | 1  |
|                  | Jordan               | 37 | 26 | 11 | 4  | 0  | 0  |
|                  | Kazakhstan           | 47 | 35 | 12 | 5  | 0  | 0  |
|                  | Kuwait               | 21 | 15 | 6  | 4  | 0  | 0  |
|                  | Kyrgyzstan           | 39 | 30 | 9  | 5  | 0  | 0  |
|                  | Laos                 | 59 | 43 | 16 | 5  | 1  | 0  |
|                  | Lebanon              | 28 | 21 | 7  | 4  | 0  | 0  |
|                  | Malaysia             | 53 | 35 | 18 | 5  | 4  | 2  |
|                  | Mongolia             | 46 | 35 | 11 | 4  | 0  | 0  |
|                  | Myanmar              | 83 | 60 | 23 | 9  | 1  | 0  |
|                  | Nepal                | 80 | 59 | 21 | 9  | 1  | 0  |
|                  | North Korea          | 33 | 22 | 11 | 4  | 2  | 0  |
|                  | Oman                 | 27 | 18 | 9  | 5  | 0  | 1  |
|                  | Pakistan             | 68 | 50 | 18 | 8  | 0  | 0  |
|                  | Papua New Guinea     | 52 | 36 | 16 | 11 | 12 | 13 |
|                  | Philippines          | 51 | 26 | 25 | 11 | 24 | 12 |
|                  | Qatar                | 13 | 10 | 3  | 3  | 0  | 0  |
|                  | Russia               | 63 | 46 | 17 | 8  | 2  | 0  |
|                  | Saudi Arabia         | 40 | 32 | 8  | 5  | 0  | 0  |
|                  | Singapore            | 26 | 18 | 8  | 0  | 1  | 0  |
|                  | South Korea          | 29 | 19 | 10 | 3  | 2  | 0  |
|                  | Sri Lanka            | 38 | 25 | 13 | 1  | 3  | 2  |
|                  | Syria                | 36 | 25 | 11 | 4  | 0  | 0  |
|                  | Tajikistan           | 38 | 30 | 8  | 5  | 0  | 0  |
|                  | Thailand             | 68 | 46 | 22 | 6  | 1  | 0  |
|                  | Timor Leste          | 17 | 14 | 3  | 0  | 0  | 0  |
|                  | Turkey               | 46 | 35 | 11 | 4  | 0  | 0  |
|                  | Turkmenistan         | 37 | 29 | 8  | 5  | 0  | 0  |
|                  | United Arab Emirates | 19 | 14 | 5  | 5  | 0  | 0  |
|                  | Uzbekistan           | 37 | 29 | 8  | 5  | 0  | 0  |
|                  | Vietnam              | 62 | 44 | 18 | 5  | 1  | 0  |
|                  | West Bank            | 32 | 24 | 8  | 4  | 0  | 0  |
|                  | Yemen                | 34 | 27 | 7  | 5  | 2  | 2  |
| <b>Australia</b> | Australia            | 35 | 24 | 11 | 1  | 10 | 0  |
| <b>Europe</b>    | Albania              | 37 | 29 | 8  | 2  | 0  | 0  |
|                  | Andorra              | 20 | 14 | 6  | 1  | 0  | 0  |
|                  | Austria              | 36 | 25 | 11 | 3  | 0  | 0  |
|                  | Belarus              | 38 | 25 | 13 | 3  | 0  | 0  |
|                  | Belgium              | 22 | 14 | 8  | 0  | 0  | 0  |

|                          |                      |    |    |    |   |   |   |
|--------------------------|----------------------|----|----|----|---|---|---|
|                          | Bosnia & Herzegovina | 39 | 29 | 10 | 4 | 0 | 0 |
|                          | Croatia              | 40 | 29 | 11 | 3 | 0 | 0 |
|                          | Czech Republic       | 30 | 20 | 10 | 2 | 0 | 0 |
|                          | Denmark              | 24 | 16 | 8  | 0 | 0 | 0 |
|                          | Estonia              | 32 | 20 | 12 | 1 | 0 | 0 |
|                          | Faroe Is.            | 1  | 1  | 0  | 0 | 0 | 0 |
|                          | Finland              | 27 | 17 | 10 | 1 | 0 | 0 |
|                          | France               | 38 | 28 | 10 | 2 | 0 | 0 |
|                          | Germany              | 30 | 19 | 11 | 0 | 0 | 0 |
|                          | Guernsey             | 4  | 1  | 3  | 0 | 0 | 0 |
|                          | Hungary              | 35 | 26 | 9  | 3 | 0 | 0 |
|                          | Iceland              | 6  | 3  | 3  | 0 | 0 | 0 |
|                          | Ireland              | 10 | 6  | 4  | 0 | 0 | 0 |
|                          | Isle of Man          | 8  | 4  | 4  | 0 | 0 | 0 |
|                          | Italy                | 40 | 30 | 10 | 3 | 0 | 0 |
|                          | Jersey               | 4  | 1  | 3  | 0 | 0 | 0 |
|                          | Latvia               | 33 | 20 | 13 | 1 | 0 | 0 |
|                          | Liechtenstein        | 19 | 12 | 7  | 0 | 0 | 0 |
|                          | Lithuania            | 33 | 20 | 13 | 1 | 0 | 0 |
|                          | Luxembourg           | 22 | 14 | 8  | 0 | 0 | 0 |
|                          | Macedonia            | 38 | 30 | 8  | 4 | 0 | 0 |
|                          | Malta                | 4  | 4  | 0  | 1 | 0 | 0 |
|                          | Moldova              | 35 | 27 | 8  | 4 | 0 | 0 |
|                          | Netherlands          | 22 | 15 | 7  | 0 | 0 | 0 |
|                          | Norway               | 24 | 14 | 10 | 0 | 0 | 0 |
|                          | Poland               | 36 | 24 | 12 | 2 | 0 | 0 |
|                          | Romania              | 40 | 29 | 11 | 4 | 0 | 0 |
|                          | San Marino           | 16 | 10 | 6  | 0 | 0 | 0 |
|                          | Serbia & Montenegro  | 41 | 31 | 10 | 4 | 0 | 0 |
|                          | Slovakia             | 36 | 25 | 11 | 3 | 0 | 0 |
|                          | Slovenia             | 33 | 22 | 11 | 1 | 0 | 0 |
|                          | Sweden               | 29 | 18 | 11 | 0 | 0 | 0 |
|                          | Switzerland          | 28 | 19 | 9  | 0 | 0 | 0 |
|                          | Ukraine              | 42 | 30 | 12 | 4 | 0 | 0 |
| United Kingdom           | 22                   | 16 | 6  | 0  | 0 | 0 |   |
| <b>North<br/>America</b> | Anguilla             | 7  | 7  | 0  | 0 | 0 | 0 |
|                          | Antigua & Barbuda    | 10 | 8  | 2  | 0 | 0 | 0 |
|                          | Aruba                | 4  | 2  | 2  | 0 | 0 | 0 |
|                          | Barbados             | 7  | 7  | 0  | 0 | 0 | 0 |
|                          | Belize               | 57 | 44 | 13 | 0 | 0 | 0 |
|                          | Canada               | 39 | 22 | 17 | 0 | 1 | 0 |
|                          | Cayman Is.           | 10 | 7  | 3  | 0 | 0 | 0 |

|                  |                              |                |    |    |   |   |   |
|------------------|------------------------------|----------------|----|----|---|---|---|
|                  | Colombia                     | 103            | 76 | 27 | 4 | 0 | 6 |
|                  | Costa Rica                   | 71             | 54 | 17 | 0 | 0 | 3 |
|                  | Cuba                         | 24             | 17 | 7  | 2 | 5 | 3 |
|                  | Dominica                     | 10             | 8  | 2  | 0 | 0 | 0 |
|                  | Dominican Republic           | 16             | 11 | 5  | 1 | 1 | 1 |
|                  | El Salvador                  | 49             | 34 | 15 | 0 | 0 | 1 |
|                  | Greenland                    | 4              | 2  | 2  | 0 | 0 | 0 |
|                  | Grenada                      | 11             | 9  | 2  | 0 | 0 | 0 |
|                  | Guadeloupe                   | 9              | 7  | 2  | 0 | 0 | 0 |
|                  | Guatemala                    | 70             | 49 | 21 | 1 | 0 | 2 |
|                  | Haiti                        | 15             | 10 | 5  | 0 | 0 | 0 |
|                  | Honduras                     | 67             | 50 | 17 | 0 | 0 | 0 |
|                  | Jamaica                      | 14             | 11 | 3  | 0 | 1 | 1 |
|                  | Martinique                   | 8              | 8  | 0  | 0 | 0 | 0 |
|                  | Mexico                       | 91             | 57 | 34 | 2 | 5 | 3 |
|                  | Montserrat                   | 6              | 6  | 0  | 0 | 0 | 0 |
|                  | Netherlands Antilles         | 5              | 2  | 3  | 0 | 0 | 0 |
|                  | Nicaragua                    | 67             | 52 | 15 | 0 | 0 | 0 |
|                  | Panama                       | 73             | 57 | 16 | 1 | 0 | 3 |
|                  | Puerto Rico                  | 15             | 11 | 4  | 0 | 1 | 1 |
|                  | St. Kitts & Nevis            | 9              | 7  | 2  | 0 | 0 | 0 |
|                  | St. Lucia                    | 8              | 8  | 0  | 0 | 0 | 0 |
|                  | St. Pierre & Miquelon        | 6              | 4  | 2  | 0 | 0 | 0 |
|                  | St. Vincent & the Grenadines | 11             | 9  | 2  | 0 | 0 | 0 |
|                  | The Bahamas                  | 12             | 10 | 2  | 0 | 0 | 0 |
|                  | Trinidad & Tobago            | 41             | 34 | 7  | 0 | 0 | 0 |
|                  | Turks & Caicos Is.           | 10             | 8  | 2  | 0 | 0 | 0 |
|                  | United States                | 61             | 37 | 24 | 1 | 5 | 2 |
|                  | Virgin Is.                   | 12             | 9  | 3  | 0 | 1 | 1 |
|                  | <b>Oceania</b>               | American Samoa | 2  | 0  | 2 | 0 | 0 |
| Chile            |                              | 31             | 23 | 8  | 1 | 0 | 0 |
| Fiji             |                              | 6              | 3  | 3  | 0 | 1 | 1 |
| French Polynesia |                              | 1              | 1  | 0  | 0 | 0 | 0 |
| Guam             |                              | 2              | 2  | 0  | 0 | 0 | 0 |
| New Caledonia    |                              | 10             | 7  | 3  | 0 | 1 | 1 |
| New Zealand      |                              | 6              | 3  | 3  | 0 | 1 | 0 |
| Niue             |                              | 2              | 0  | 2  | 0 | 0 | 0 |
| Palau            |                              | 3              | 1  | 2  | 0 | 1 | 1 |
| Samoa            |                              | 2              | 0  | 2  | 0 | 0 | 0 |
| Solomon Is.      |                              | 19             | 12 | 7  | 3 | 2 | 8 |
| Tonga            |                              | 2              | 0  | 2  | 0 | 0 | 0 |
| Vanuatu          |                              | 5              | 3  | 2  | 0 | 0 | 0 |

|                      |               |     |    |    |   |   |   |
|----------------------|---------------|-----|----|----|---|---|---|
| <b>South America</b> | Argentina     | 86  | 62 | 24 | 2 | 0 | 0 |
|                      | Bolivia       | 96  | 70 | 26 | 2 | 0 | 1 |
|                      | Brazil        | 95  | 73 | 22 | 3 | 2 | 1 |
|                      | Ecuador       | 102 | 73 | 29 | 6 | 1 | 8 |
|                      | Falkland Is.  | 12  | 7  | 5  | 0 | 0 | 0 |
|                      | French Guiana | 68  | 54 | 14 | 0 | 0 | 0 |
|                      | Guyana        | 72  | 55 | 17 | 0 | 0 | 0 |
|                      | Paraguay      | 75  | 55 | 20 | 1 | 0 | 0 |
|                      | Peru          | 102 | 70 | 32 | 4 | 2 | 6 |
|                      | Suriname      | 67  | 53 | 14 | 0 | 0 | 0 |
|                      | Uruguay       | 40  | 30 | 10 | 1 | 0 | 0 |
|                      | Venezuela     | 88  | 66 | 22 | 1 | 0 | 0 |
